# Supplementary material
Source: ML conference proceedings conference paper supplement (https://proceedings.mlr.press/v108/peng20a.html)
Supplement: Supplementary file 1 [file peng20a-supp.pdf]

## A Reference on Concentration Inequalities

**Theorem 17 (Hoeffding's Inequality)** Let  $X_1, X_2, \dots, X_n$  be independent random variables bounded by the interval  $[a, b] : a \leq X_i \leq b$ , then we define  $X = X_1 + \dots + X_n$ . We have

$$\Pr[X - \mathbb{E}[X] \geq t] \leq \exp\left(-\frac{2t^2}{n(b-a)^2}\right).$$

**Theorem 18 (Chernoff Bound)** Suppose  $X_1, \dots, X_n$  are independent random variables,  $X_i \in [0, 1]$ . Let  $X = X_1 + X_2 + \dots + X_n$  and let  $\mu = \mathbb{E}[X]$  denote the sum's expected value. Then for  $0 \leq \delta \leq 1$ ,

$$\Pr[X \geq (1 + \delta)\mu] \leq e^{-\frac{\delta^2 \mu}{3}}.$$

## B Deferred Proofs in Section 3.1

*Proof of Lemma 5.* For simplicity of the exposition, we assume that  $f$  is a deterministic policy. The case for randomized  $f$  can be analogously addressed.

Suppose  $f(S)$  decides to query arm  $i$ . Let  $r$  be observation seen by policy  $f$  after the query and let  $\tilde{r}$  be the observation (or the pretended observation) seen by policy  $\tilde{f}$ . We only need to prove that  $\Pr[r = 1 | S_t = S] = \Pr[\tilde{r} = 1 | \tilde{S}_t = S]$  since  $f$  uses  $r$  and  $\tilde{f}$  uses  $\tilde{r}$  to update their query history on arm  $i$ .

Now let us condition on the event that the current state for  $\tilde{f}$  is  $S$ . Let  $(a_i, b_i) \in S$  be the query history on arm  $i$  in recorded  $S$ . We claim that the probability that  $\tilde{r} = 1$  is  $\mathbb{E} \text{Beta}(a_i + 1, b_i + 1)$ , which is the same as  $\Pr[r = 1 | S_t = S]$ , proving the lemma.

Suppose that  $i \notin C$ , by the construction of  $\tilde{f}$ , a real query is made to arm  $i$  and  $\tilde{r}$  is the observation bit. Therefore, in this case, the probability that  $\tilde{r} = 1$  is  $\mathbb{E} \text{Beta}(a_i + 1, b_i + 1)$ .

Otherwise, we have that  $i \in C$ . Let  $q = a_i + b_i$ . Let  $\tilde{r}_1, \tilde{r}_2, \dots, \tilde{r}_q$  be the  $q$  observations (including pretended ones) for arm  $i$  seen by  $\tilde{f}$ . We have  $\sum_{j=1}^q \tilde{r}_j = a_i$ . Let  $\tilde{q} = \tilde{a}_i + \tilde{b}_i$ . We have that  $\tilde{f}$  has made  $\tilde{q}$  real queries on arm  $i$ , and that  $\sum_{j=1}^{\tilde{q}} \tilde{r}_j = \tilde{a}_i$ . In this case, we have

$$\begin{aligned} & \Pr[\tilde{r} = 1 | \tilde{S} = S] \\ &= \mathbb{E}_{\tilde{q}} \mathbb{E}_{\tilde{\theta}_i \sim \text{Beta}(\tilde{a}_i + 1, \tilde{b}_i + 1)} \left[ \tilde{\theta}_i | \tilde{r}_{\tilde{q}+1}, \tilde{r}_{\tilde{q}+2}, \dots, \tilde{r}_q \right] \\ &= \mathbb{E}_{\tilde{q}} \mathbb{E} \left[ \text{Beta} \left( \tilde{a}_i + 1 + \sum_{j=\tilde{q}+1}^q \tilde{r}_j, \tilde{b}_i + 1 + \sum_{j=\tilde{q}+1}^q (1 - \tilde{r}_j) \right) \right] \\ &= \mathbb{E}_{\tilde{q}} \text{Beta}(a_i + 1, b_i + 1) = \mathbb{E} \text{Beta}(a_i + 1, b_i + 1). \end{aligned}$$

□

*Proof of Lemma 7.* We only need to prove that when  $|\tilde{a}_i - \tilde{b}_i| > \sqrt{\tilde{a}_i + \tilde{b}_i} \cdot 3 \ln M$ , we have  $\text{err}(\tilde{a}_i, \tilde{b}_i) < \frac{1}{2\sqrt{M}}$ . Let us assume without loss of generality that  $\tilde{a}_i \geq \tilde{b}_i$ , and let  $\delta = \frac{2\tilde{a}_i}{\tilde{a}_i + \tilde{b}_i} - 1 \geq \frac{3 \ln M}{\sqrt{\tilde{a}_i + \tilde{b}_i}}$ . We have

$$\text{err}(\tilde{a}_i, \tilde{b}_i) = \Pr[\text{Beta}(\tilde{a}_i + 1, \tilde{b}_i + 1) < .5] \tag{11}$$

$$\begin{aligned} &= \frac{\Gamma(\tilde{a}_i + \tilde{b}_i + 1)}{\Gamma(\tilde{a}_i)\Gamma(\tilde{b}_i)} \int_0^{\frac{1}{2}} x^{\tilde{a}_i} (1-x)^{\tilde{b}_i} dx \\ &\leq \frac{\Gamma(\tilde{a}_i + \tilde{b}_i + 1)}{\Gamma(\tilde{a}_i)\Gamma(\tilde{b}_i)} \int_0^{\frac{1}{2}} 2^{-(\tilde{a}_i + \tilde{b}_i)} dx \tag{12} \end{aligned}$$

$$= \frac{(\tilde{a}_i + \tilde{b}_i)! \cdot (\tilde{a}_i + \tilde{b}_i + 1)}{\tilde{a}_i! \tilde{b}_i! \cdot 2^{(\tilde{a}_i + \tilde{b}_i + 1)}}. \quad (13)$$

Now we use Stirling's formula ( $\sqrt{2\pi n}(n/e)^n \leq n! \leq e\sqrt{n}(n/e)^n$  for every positive integer  $n$ ), and have

$$(13) \leq (\tilde{a}_i + \tilde{b}_i + 1) \cdot \frac{e\sqrt{\tilde{a}_i + \tilde{b}_i}}{2\pi\sqrt{\tilde{a}_i\tilde{b}_i}} \cdot \left(\frac{\tilde{a}_i + \tilde{b}_i}{\tilde{a}_i}\right)^{\tilde{a}_i} \left(\frac{\tilde{a}_i + \tilde{b}_i}{\tilde{b}_i}\right)^{\tilde{b}_i}. \quad (14)$$

Note that

$$\left(\frac{\tilde{a}_i + \tilde{b}_i}{\tilde{a}_i}\right)^{\tilde{a}_i} \left(\frac{\tilde{a}_i + \tilde{b}_i}{\tilde{b}_i}\right)^{\tilde{b}_i} = (1 + \delta)^{-\tilde{a}_i} (1 - \delta)^{-\tilde{b}_i} \quad (15)$$

$$= \left((1 + \delta)^{(1+\delta)} (1 - \delta)^{(1-\delta)}\right)^{-(\tilde{a}_i + \tilde{b}_i)/2}. \quad (16)$$

Since we have  $(1 + \delta)^{(1+\delta)} (1 - \delta)^{(1-\delta)} \geq \exp(\delta^2)$  for  $\delta \in [0, 1]$  (where  $0^0$  is defined to be 1), combining (13), (14), and (16), we have

$$\begin{aligned} \text{err}(\tilde{a}_i, \tilde{b}_i) &\leq (\tilde{a}_i + \tilde{b}_i + 1)^{1.5} \exp(-\delta^2(\tilde{a}_i + \tilde{b}_i)/2) \\ &\leq (\tilde{a}_i + \tilde{b}_i + 1)^{1.5} \exp(-(9 \ln M)/2) \leq \frac{1}{2\sqrt{M}}, \end{aligned}$$

where the second inequality is because of  $\delta \geq \frac{3 \ln M}{\sqrt{\tilde{a}_i + \tilde{b}_i}}$  and the last inequality is because of  $\tilde{a}_i + \tilde{b}_i \leq 100M \ln^2 M$  and for sufficiently large  $M$ .  $\square$

*Proof of Lemma 8.* Let  $a$  and  $b$  be the number of 1's and 0's after querying  $i$  for  $100M \ln^2 M$  times. If  $i$  is corrupted but not marked when  $\tilde{f}$  terminates, then we have  $|a - b| \leq \sqrt{a + b} \cdot 3 \ln M = \sqrt{100M \ln^2 M} \cdot (3 \ln M)$ . So,

$$\begin{aligned} &\Pr[i \text{ corrupted but not marked}] \\ &\leq \Pr[|a - b| \leq \sqrt{100M \ln^2 M} \cdot (3 \ln M)] \\ &\leq \Pr\left[|a - b| \leq \sqrt{100M \ln^2 M} \cdot (3 \ln M) \mid |\theta_i - 0.5| > \frac{1}{6\sqrt{M}}\right] + \Pr\left[|\theta_i - 0.5| \leq \frac{1}{6\sqrt{M}}\right] \\ &\leq \Pr\left[|a - b| \leq \sqrt{100M \ln^2 M} \cdot (3 \ln M) \mid |\theta_i - 0.5| > \frac{1}{6\sqrt{M}}\right] + \frac{1}{3\sqrt{M}} \\ &\leq \Pr\left[a > 50M \ln^2 M - 15\sqrt{M} \ln^2 M \mid \theta_i \leq \frac{1}{2} - \frac{1}{6\sqrt{M}}\right] + \frac{1}{3\sqrt{M}}. \end{aligned} \quad (17)$$

The last inequality holds because  $a$  and  $b$  are symmetric (so that we can assume  $\theta_i \leq \frac{1}{2}$  without loss of generality). Note that  $a = \sum_{j=1}^{100M \ln^2 M} X_j$  where  $X_j$ 's are *i.i.d.* samples from  $\mathcal{B}_{\theta_i}$ . Using Hoeffding's inequality (Theorem 17) with  $\mathbb{E}[a] \leq 50M \ln^2 M - \frac{50}{3}\sqrt{M} \ln^2 M$ , we have

$$\begin{aligned} &\Pr\left[a > 50M \ln^2 M - 15\sqrt{M} \ln^2 M \mid \theta_i \leq \frac{1}{2} - \frac{1}{6\sqrt{M}}\right] \\ &= \Pr\left[a - \mathbb{E}[a] > \frac{5}{3}\sqrt{M} \ln^2 M \mid \theta_i \leq \frac{1}{2} - \frac{1}{6\sqrt{M}}\right] \\ &\leq \exp\left(-\frac{2 \cdot (\frac{5}{3}\sqrt{M} \ln^2 M)^2}{100M \ln^2 M}\right) \\ &\leq \exp(-\ln^2 M/18) \leq \frac{1}{M \ln M}, \end{aligned} \quad (18)$$

for sufficiently large  $M$ . Combining (17) and (18), we have

$$\Pr[i \text{ corrupted but not marked}] \leq \frac{1}{M \ln M} + \frac{1}{3\sqrt{M}} \leq \frac{1}{2\sqrt{M}}.$$

□

## C Proof of Lemma 9

We let  $\tilde{f}$  be an  $\epsilon^{-2}$ -BQP with query budget  $Q$  and  $\text{val}(\tilde{f}) \geq \text{OPT}(Q) - \epsilon$  (which is possible by Lemma 2). We build a policy  $g$  as follows. At the beginning, for each arm  $i$ ,  $g$  samples an independent random bit  $y_i \in \{0, 1\}$  where  $\mathbb{E} y_i = 2\epsilon$ . For each arm  $i$  with  $y_i = 1$ ,  $g$  samples  $\tilde{\theta}_i$  from the uniform distribution over  $[0, 1]$  (i.e., the prior distribution of  $\theta_i$ ). Now  $g$  maintains a state of query history  $\tilde{S} = \{(a_1, b_1), \dots, (a_n, b_n)\}$  where  $a_i$  and  $b_i$  are initialized to 0 for all  $i \in [n]$ .  $g$  now simulates the policy  $\tilde{f}$ . Whenever  $\tilde{f}(\tilde{S})$  decides to query arm  $i$ , if  $y_i = 0$ ,  $g$  directly queries the arm and updates the state  $\tilde{S}$ ; otherwise  $g$  make a simulated query by sampling a bit from  $\mathcal{B}_{\tilde{\theta}_i}$  and update the query history using this bit.  $g$  also keeps track of the total number of real queries that have been made. Whenever this number exceeds  $(1 - \epsilon)Q$ ,  $g$  terminates and gives up. When  $\tilde{f}$  terminates and decides the guess for each arm,  $g$  does the same thing.

It is clear that  $g$  queries at most  $(1 - \epsilon)Q$  times. Now it suffices to prove that  $\text{val}(g) \geq \text{val}(\tilde{f}) - 3\epsilon$ .

**Lemma 19** *When  $Q \geq 1200\epsilon^{-4} \ln^3 \epsilon^{-1}$ , the probability that  $g$  exceeds the budget limit and gives up is at most  $\epsilon$ .*

*Proof of Lemma 19.* Let us imagine that  $g$  does not terminate even when the number of real queries exceeds the budget, and finally reaches a final state  $\tilde{S} = \{(a_1, b_1), \dots, (a_n, b_n)\}$  for  $\tilde{f}$ . In the real run of  $g$ , the probability that  $g$  gives up exactly

$$\Pr \left[ \sum_{i=1}^n (1 - y_i)(a_i + b_i) > (1 - \epsilon)Q \right] = \mathbb{E}_{\tilde{S}} \Pr \left[ \sum_{i=1}^n (1 - y_i)(a_i + b_i) > (1 - \epsilon)Q \mid \tilde{S} \right].$$

One can verify that  $\{y_1, y_2, \dots, y_n\}$  is independent from  $\tilde{S}$ , and therefore conditioned on  $\tilde{S}$ ,  $\{y_1, y_2, \dots, y_n\}$  follows the same *i.i.d.* distribution. Therefore, if we let  $X_i = \frac{(1 - y_i)(a_i + b_i)}{400\epsilon^{-2} \ln^2 \epsilon^{-1}}$ , we have that  $X_i$ 's are independent random variables bounded in  $[0, 1]$  (by the definition of  $\epsilon^{-2}$ -BQP) and  $\mathbb{E} \sum_{i=1}^n X_i = \frac{(1 - 2\epsilon)Q}{400\epsilon^{-2} \ln^2 \epsilon^{-1}}$ .

By Chernoff Bound (Theorem 18), we have

$$\Pr \left[ \sum_{i=1}^n (1 - y_i)(a_i + b_i) > (1 - \epsilon)Q \mid \tilde{S} \right] = \Pr \left[ \sum_{i=1}^n X_i > \frac{(1 - \epsilon)Q}{400\epsilon^{-2} \ln^2 \epsilon^{-1}} \mid \tilde{S} \right] < \exp \left( -\frac{\epsilon^2}{3} \cdot \frac{(1 - 2\epsilon)Q}{400\epsilon^{-2} \ln^2 \epsilon^{-1}} \right),$$

which is at most  $\epsilon$  when  $Q \geq 1200\epsilon^{-4} \ln^3 \epsilon^{-1}$ .

Finally, the probability that  $g$  gives up is

$$\mathbb{E}_{\tilde{S}} \Pr \left[ \sum_{i=1}^n (1 - y_i)(a_i + b_i) > (1 - \epsilon)Q \mid \tilde{S} \right] \leq \mathbb{E}_{\tilde{S}} \epsilon = \epsilon.$$

□

**Lemma 20** *Let  $S$  be a query history state of  $\tilde{f}$ . For every realization of  $y_1, y_2, \dots, y_n$ , when  $\sum_{i=1}^n (1 - y_i)(a_i + b_i) \leq (1 - \epsilon)Q$ , we have  $\Pr[\tilde{f} \text{ reaches } S] = \Pr[g \text{ does not give up and reaches } S \mid y_1, y_2, \dots, y_n]$ .*

*Proof of Lemma 20.* We have

$$\Pr[\tilde{f} \text{ reaches } S] = \Pr[\tilde{f} \text{ reaches } S \mid y_1, y_2, \dots, y_n],$$

where in the LHS we consider a run of  $\tilde{f}$ ; in the RHS we consider a run of  $g$  (which also simulates  $\tilde{f}$ ) and we imagine the run does not terminate even when the number of real queries exceeds the budget. The equality holds because of the independence between  $\{y_1, y_2, \dots, y_n\}$  and the state of  $g$ . Also note that the RHS is equivalent to

$$\Pr[g \text{ does not give up and reaches } S | y_1, y_2, \dots, y_n]$$

when  $\sum_{i=1}^n (1 - y_i)(a_i + b_i) \leq (1 - \epsilon)Q$ , and therefore the lemma is proved.  $\square$

With [Lemma 19](#) and [Lemma 20](#), we are ready to prove [Lemma 9](#).

*Proof of Lemma 9.* Recall that it suffices to prove that  $\text{val}(g) \geq \text{val}(\tilde{f}) - 3\epsilon$ . Given a realization of  $y_1, \dots, y_n$ , consider a run of  $\tilde{f}$  and let  $S = \{(a_1, b_1), \dots, (a_n, b_n)\}$  be the terminal state reached by  $\tilde{f}$ . Here we define  $S$  to be *good* if  $\sum_{i=1}^n (1 - y_i)(a_i + b_i) \leq (1 - \epsilon)Q$ . Note that when  $y_i = 1$ , we do not really query arm  $i$ , therefore  $\text{val}(g)$  is lower bounded by

$$\begin{aligned} & \mathbb{E}_{y_1, \dots, y_n} \sum_{\text{good } S} \frac{1}{n} \left( \sum_{i=1}^n (1 - \text{err}(a_i, b_i)) - \sum_{i=1}^n y_i \right) \cdot \Pr[g \text{ reaches } S | y_1, \dots, y_n] \\ & \geq \mathbb{E}_{y_1, \dots, y_n} \sum_{\text{good } S} \frac{1}{n} \sum_{i=1}^n (1 - \text{err}(a_i, b_i)) \cdot \Pr[g \text{ reaches } S | y_1, \dots, y_n] - \mathbb{E}_{y_1, \dots, y_n} \frac{1}{n} \sum_{i=1}^n y_i \\ & = \mathbb{E}_{y_1, \dots, y_n} \sum_{\text{good } S} \frac{1}{n} \sum_{i=1}^n (1 - \text{err}(a_i, b_i)) \cdot \Pr[g \text{ reaches } S | y_1, \dots, y_n] - 2\epsilon. \end{aligned} \quad (19)$$

When  $S$  is good, if  $g$  reaches  $S$ , it means  $g$  does not give up. According to [Lemma 20](#), for good  $S$ ,  $\Pr[\tilde{f} \text{ reaches } S] = \Pr[g \text{ reaches } S | y_1, \dots, y_n]$ , thus we can write (19) as

$$\begin{aligned} & \mathbb{E}_{y_1, \dots, y_n} \sum_{\text{good } S} \frac{1}{n} \sum_{i=1}^n (1 - \text{err}(a_i, b_i)) \Pr[\tilde{f} \text{ reaches } S] - 2\epsilon \\ & \geq \mathbb{E}_{y_1, \dots, y_n} \sum_{\text{terminal } S} \frac{1}{n} \sum_{i=1}^n (1 - \text{err}(a_i, b_i)) \Pr[\tilde{f} \text{ reaches } S] - \mathbb{E}_{y_1, \dots, y_n} \Pr[g \text{ gives up} | y_1, \dots, y_n] - 2\epsilon \\ & = \mathbb{E}_{y_1, \dots, y_n} [\text{val}(\tilde{f}) - \Pr[g \text{ gives up} | y_1, \dots, y_n]] - 2\epsilon \\ & \geq \text{val}(\tilde{f}) - \Pr[g \text{ gives up}] - 2\epsilon \\ & \geq \text{val}(\tilde{f}) - 3\epsilon, \end{aligned}$$

where the last inequality holds because of [Lemma 19](#).  $\square$

## D Deferred Proof(s) in [Section 3.3](#)

*Proof of Lemma 10.* Given an  $M$ -BQP  $\tilde{f}$  with query budget  $Q$ , we define the policy  $\tilde{g}$  as follows.  $\tilde{g}$  simulates  $\tilde{f}$ . For each arm  $i$ ,  $\tilde{g}$  also keeps a buffer of observations, which is initialized to be empty. Whenever  $\tilde{f}(S)$  decides to query arm  $i$ , if the arm's buffer is empty, suppose arm  $i$  has been queried by  $\tilde{f}$  for  $\tau_j$  times,  $\tilde{g}$  makes  $(\tau_{j+1} - \tau_j)$  queries to arm  $i$  and add all observations to the buffer. Then  $\tilde{g}$  extracts one observation from the buffer which is served as the observation of the query made by  $\tilde{f}(S)$ . Whenever  $\tilde{f}$  terminates and decides,  $\tilde{g}$  also terminates and decides.

It is straightforward to verify that 1)  $\text{val}(\tilde{g}) = \text{val}(\tilde{f})$ , 2)  $\tilde{g}$  satisfies the two constraints for an  $M$ -BQP (since  $\tilde{f}$  is an  $M$ -BQP) and the additional constraint for a  $(\gamma, M)$ -BBQP. Finally, we verify that  $\tilde{g}$  makes at most  $(1 + \gamma)Q$  queries. Let  $q_i$  be the total number of queries made to arm  $i$  by  $\tilde{f}$ . Let  $\tilde{q}_i$  be the total number of queries made to arm  $i$  by  $\tilde{g}$ . Once can verify that  $\tilde{q}_i \leq (1 + \gamma)q_i$ . Therefore the total number of queries made by  $\tilde{g}$  is  $\sum_{i=1}^n \tilde{q}_i \leq \sum_{i=1}^n (1 + \gamma)q_i \leq (1 + \gamma)Q$ .  $\square$
